# Supplementary material for: Glofitamab monotherapy induces high complete response rates and manageable safety in Chinese patients with heavily pretreated relapsed or refractory diffuse large B-cell lymphoma
Source: PubMed Central journal article supplement — Haematologica. 2023 Oct 19;109(4):1269–73. doi: 10.3324/haematol.2023.283802 (PMC10985436; doi:10.3324/haematol.2023.283802), 2023-10-19
Supplement: 2023_283802_SONG_SUPPL.pdf [file 2023_283802_SONG_SUPPL.pdf]

# Glofitamab monotherapy induces high complete response rates and manageable safety in Chinese patients with heavily pretreated relapsed or refractory diffuse large B-cell lymphoma

Yu-Qin Song,<sup>1</sup> Hui-Lai Zhang,<sup>2</sup> Hui-Qiang Huang,<sup>3</sup> Qing-Yuan Zhang,<sup>4</sup> Hong-Mei Jing,<sup>5</sup> Chao Wang,<sup>6</sup> Chun Wu,<sup>6</sup> Dong-Hang Li,<sup>6</sup> Yu Dai,<sup>7</sup> Kathryn Humphrey<sup>8</sup> and Jun Zhu<sup>1</sup>

<sup>1</sup>Key Laboratory of Carcinogenesis and Translational Research (Ministry of Education), Peking University Cancer Hospital & Institute, Beijing, China; <sup>2</sup>Tianjin Medical University Cancer Institute and Hospital, Tianjin, China; <sup>3</sup>Sun Yat-sen University Cancer Center,

Guangzhou, China; <sup>4</sup>Harbin Medical University Cancer Hospital, Harbin, China; <sup>5</sup>Peking University Third Hospital, Beijing, China; <sup>6</sup>Roche (China) Holding Ltd., Shanghai, China; <sup>7</sup>Roche R&D Center (China) Ltd., Shanghai, China and <sup>8</sup>Roche Products Ltd., Welwyn Garden City, UK

Correspondence:  
J. ZHU - zhujun@cSCO.org.cn

## SUPPLEMENTARY DATA

### Supplementary Table S1. Any grade AEs occurring in ≥10% of patients

(safety population).

| AE — No. of patients (%)         | N=30       |
|----------------------------------|------------|
| Any AE                           | 30 (100.0) |
| Most common AEs (≥10%)           |            |
| Cytokine release syndrome        | 19 (63.3)  |
| Anemia                           | 17 (56.7)  |
| Decreased white blood cell count | 16 (53.3)  |
| Decreased neutrophil count       | 14 (46.7)  |
| Decreased platelet count         | 13 (43.3)  |
| Hypoalbuminemia                  | 10 (33.3)  |
| Increased ALT                    | 9 (30.0)   |
| Pyrexia                          | 9 (30.0)   |
| Decreased lymphocyte count       | 8 (26.7)   |
| Increased AST                    | 8 (26.7)   |
| Increased C-reactive protein     | 8 (26.7)   |
| Hypertriglyceridemia             | 7 (23.3)   |
| Hyponatremia                     | 7 (23.3)   |
| Hypertension                     | 6 (20.0)   |
| Hypocalcemia                     | 6 (20.0)   |
| Infusion-related reaction        | 6 (20.0)   |
| Cough                            | 5 (16.7)   |
| Hyperuricemia                    | 5 (16.7)   |
| Hypokalemia                      | 5 (16.7)   |
| Pain                             | 5 (16.7)   |
| Diarrhea                         | 4 (13.3)   |
| Herpes zoster                    | 4 (13.3)   |
| Increased blood bilirubin        | 4 (13.3)   |
| Increased blood pressure         | 4 (13.3)   |
| Abdominal distension             | 3 (10.0)   |
| Constipation                     | 3 (10.0)   |
| Hypochloremia                    | 3 (10.0)   |
| Hypophosphatemia                 | 3 (10.0)   |
| Increased blood glucose          | 3 (10.0)   |
| Increased serum ferritin         | 3 (10.0)   |

AE: adverse event; ALT: alanine aminotransferase; AST: aspartate aminotransferase.

**Supplementary Figure S1.** Mean ( $\pm$ SD) glofitamab serum concentration versus time profiles (PK population)\*.

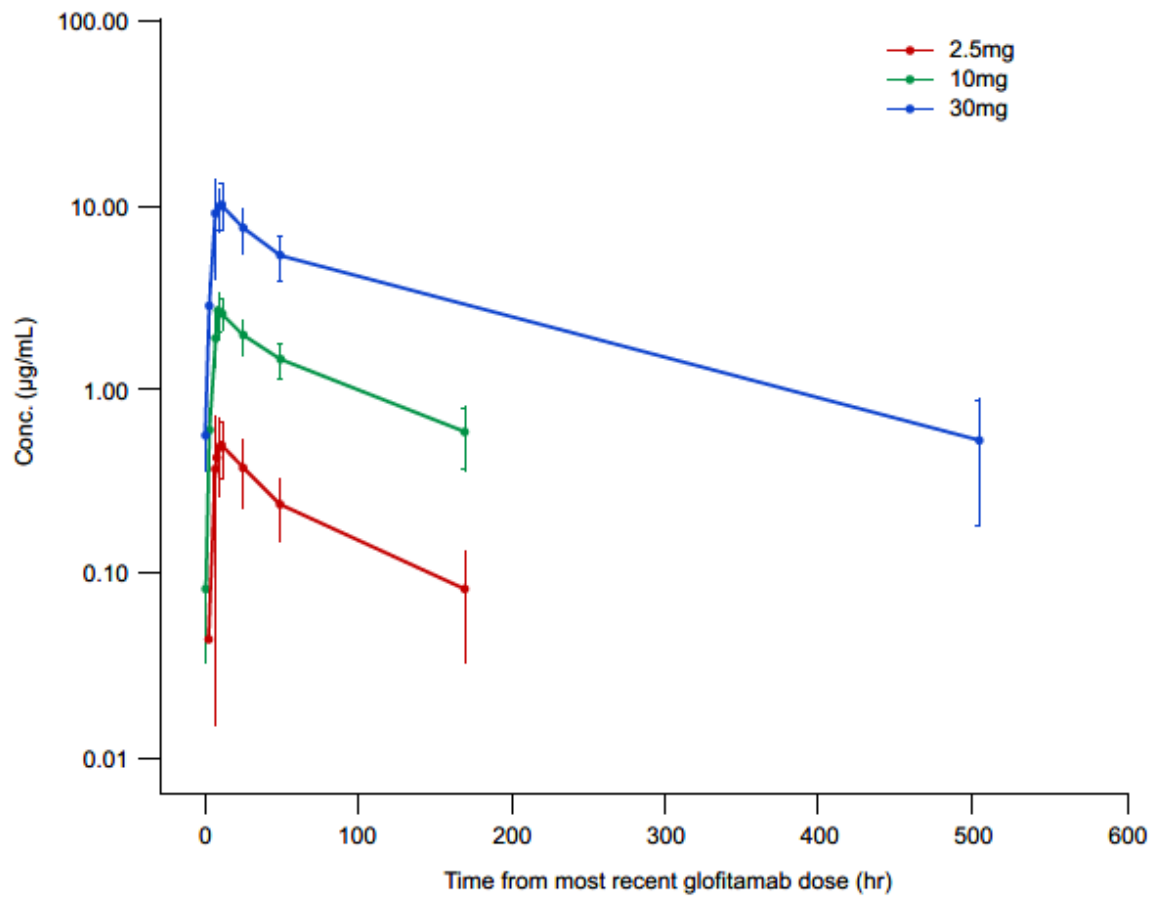

\*Only Cycle 1 and Cycle 2 data are included due to intensive PK sampling.  
Conc.: concentration; hr: hour; PK: pharmacokinetic; SD: standard deviation.

**Supplementary Figure S2.** Best response rate (assessed by IRC using Lugano 2014 criteria) in patients who received glofitamab, by DLBCL subtype and CAR T-cell therapy treatment status.

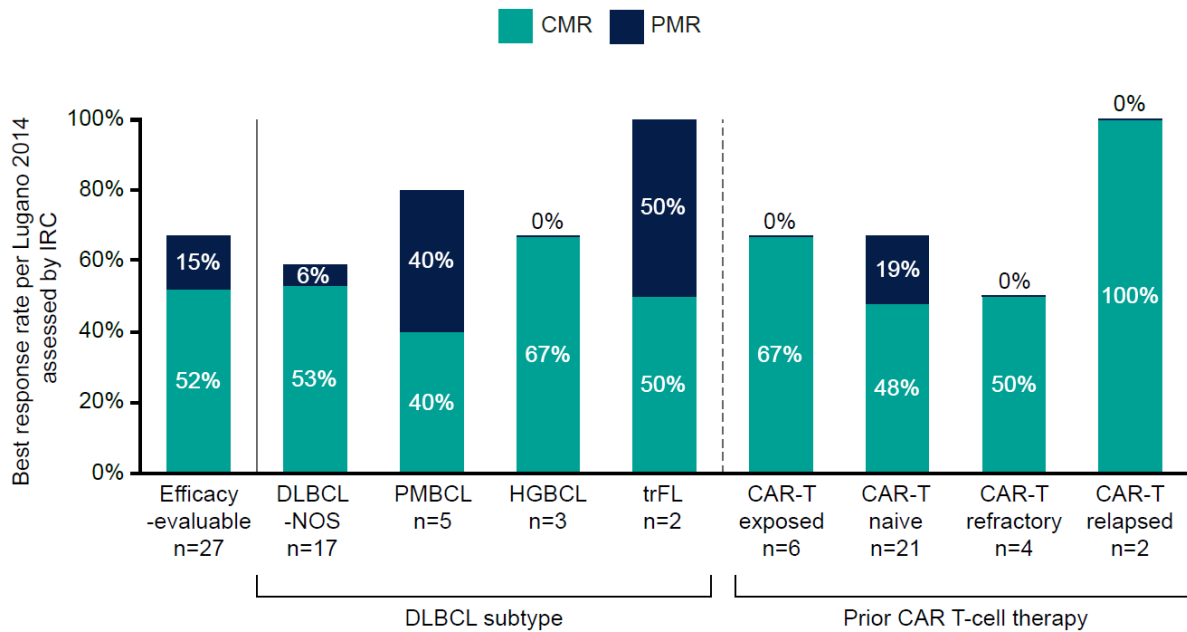

CAR-T: chimeric antigen receptor T-cell; CMR: complete metabolic response; DLBCL: diffuse large B-cell lymphoma; HGBCL: high-grade B-cell lymphoma; IRC: independent review committee; NOS: not otherwise specified; PMBCL: primary mediastinal large B-cell lymphoma; PMR: partial metabolic response; trFL: transformed follicular lymphoma.
